# Supplementary material
Source: PubMed Central journal article supplement (PMC1681495)
Supplement: msb4100063-s1.pdf [file msb4100063-s1.pdf]

## Supplementary Materials

Table I

| 2ptcE    |      | 119hA    |      | 1bz0AB   |      | 101m     |      | 1gpaA    |      | 1g5yB    |      | 1kzkA    |      |
|----------|------|----------|------|----------|------|----------|------|----------|------|----------|------|----------|------|
| All memb | Repr |
| 30E      | 30E  | 57A      | 57A  | 98       | 14A  | 14       | 24   | 163A     | 90A  | 307B     | 307B | 85A      | 23A  |
| 46E      | 46E  | 67A      | 67A  | 99       | 15B  | 42       | 26   | 166A     | 163A | 353B     | 309B | 87A      | 28A  |
| 138E     | 53E  | 261A     | 73A  | 103      | 42A  | 69       | 42   | 182A     | 166A | 420B     | 324B |          | 32A  |
| 141E     | 138E | 265A     | 122A | 131      | 65A  | 71       | 69   | 273A     | 179A | 424B     | 330B |          | 50A  |
| 189E     | 141E | 268A     | 253A | 141      | 65B  | 89       | 71   | 277A     | 180A | 426B     | 352B |          | 85A  |
| 194E     | 189E | 293A     | 268A | 145      | 66A  | 104      | 72   | 608A     | 184A |          | 421B |          | 87A  |
| 212E     | 194E | 301A     | 293A |          | 68B  | 107      | 89   |          | 185A |          | 426B |          |      |
| 213E     | 212E | 312A     | 296A |          | 70B  | 131      | 104  |          | 194A |          | 431B |          |      |
| 227A     | 213E |          | 301A |          | 71B  |          | 138  |          | 196A |          | 438B |          |      |
| 228A     | 227E |          | 302A |          | 85B  |          |      |          | 250A |          | 443B |          |      |
|          | 228E |          | 312A |          | 98A  |          |      |          | 269A |          |      |          |      |
|          |      |          |      |          | 101A |          |      |          | 271A |          |      |          |      |
|          |      |          |      |          | 106A |          |      |          | 273A |          |      |          |      |
|          |      |          |      |          | 110B |          |      |          | 277A |          |      |          |      |
|          |      |          |      |          | 128A |          |      |          | 568A |          |      |          |      |
|          |      |          |      |          |      |          |      |          | 608A |          |      |          |      |
|          |      |          |      |          |      |          |      |          |      |          |      |          |      |

**Table I** List of predicted interconnectivity determinants (ICD) and conserved interconnectivity determinants (CICD) for each protein family in our study.

Table II

| 2ptc   |           | 119h   |           | 101m   |           | 1gpa   |           |
|--------|-----------|--------|-----------|--------|-----------|--------|-----------|
| CICDs  | CONSERVED | CICDs  | CONSERVED | CICDs  | CONSERVED | CICDs  | CONSERVED |
| Gln30  | GLY19     | Leu57  | MET1      | Trp14  | VAL1      | Phe163 | ALA54     |
| Leu46  | CYS22     | Lys67  | ASN2      | Lys42  | LEU2      | Phe166 | THR70     |
| Ile138 | SER32     | Phe261 | GLY3      | Leu69  | GLU6      | Trp182 | TYR84     |
| Trp141 | CYS42     | Trp265 | THR4      | Ala71  | TRP7      | Glu273 | SER86     |
| Asp189 | GLY43     | Tyr268 | GLU5      | Leu89  | VAL10     | Arg277 | GLU88     |
| Asp194 | LEU46     | Phe293 | GLY6      | Leu104 | LEU11     | Lys608 | TYR90     |
| Ile212 | TRP51     | Tyr301 | PHE9      | Ile107 | TRP14     |        | GLY92     |
| Val213 | VAL52     | Gln312 | TYR10     | Met131 | LYS16     |        | LEU95     |
| Val227 | SER54     |        | PRO12     |        | VAL17     |        | ASN97     |
| Tyr228 | ALA55     |        | ASN15     |        | GLU18     |        | GLU126    |
|        | ALA56     |        | GLY18     |        | ASP20     |        | ASP128    |
|        | HIS57     |        | PRO23     |        | HIS24     |        | ALA129    |
|        | CYS58     |        | PRO27     |        | GLY25     |        | LEU131    |

|  |        |  |        |  |        |  |        |
|--|--------|--|--------|--|--------|--|--------|
|  | VAL65  |  | GLN28  |  | LEU32  |  | GLY132 |
|  | LEU67  |  | TYR29  |  | PHE33  |  | ASN133 |
|  | GLY69  |  | TYR30  |  | HIS36  |  | GLY134 |
|  | HIS91  |  | LEU31  |  | PRO37  |  | GLY135 |
|  | PRO92  |  | LEU40  |  | GLU38  |  | LEU136 |
|  | ASP102 |  | ALA42  |  | THR39  |  | GLY137 |
|  | MET104 |  | TYR43  |  | LEU40  |  | ARG138 |
|  | LEU105 |  | MET44  |  | GLU41  |  | LEU139 |
|  | VAL118 |  | PHE45  |  | LYS42  |  | ALA140 |
|  | CYS136 |  | LEU47  |  | PHE43  |  | ALA141 |
|  | SER139 |  | ILE48  |  | LYS47  |  | CYS142 |
|  | GLY140 |  | GLY51  |  | LYS50  |  | ASP145 |
|  | TRP141 |  | PRO53  |  | MET55  |  | SER146 |
|  | GLY142 |  | ASN55  |  | SER58  |  | ALA148 |
|  | CYS157 |  | PHE56  |  | LEU61  |  | THR149 |
|  | CYS168 |  | THR58  |  | LYS63  |  | GLY156 |
|  | ILE176 |  | LEU59  |  | GLY65  |  | TYR157 |
|  | MET180 |  | VAL61  |  | VAL68  |  | GLY158 |
|  | CYS182 |  | THR62  |  | LEU69  |  | TYR161 |
|  | CYS191 |  | LYS66  |  | ALA71  |  | GLY164 |
|  | ASP194 |  | LYS67  |  | LEU72  |  | PHE166 |
|  | SER195 |  | LEU68  |  | GLY73  |  | GLN168 |
|  | GLY196 |  | ARG69  |  | LEU76  |  | GLN175 |
|  | GLY197 |  | PRO71  |  | LYS77  |  | GLU177 |
|  | PRO198 |  | LEU72  |  | LYS78  |  | ASP180 |
|  | VAL199 |  | ASN73  |  | GLY80  |  | TRP182 |
|  | CYS201 |  | TYR74  |  | ALA84  |  | LEU183 |
|  | GLY211 |  | ILE75  |  | LEU89  |  | GLU190 |
|  | VAL213 |  | LEU77  |  | ALA90  |  | GLY204 |
|  | SER214 |  | ASN78  |  | SER92  |  | VAL206 |
|  | GLY216 |  | LEU79  |  | HIS93  |  | ASP227 |
|  | CYS220 |  | PHE85  |  | ALA94  |  | ARG242 |
|  | PRO225 |  | MET86  |  | LYS96  |  | TRP244 |
|  | TRP237 |  | GLY90  |  | HIS97  |  | ASN258 |
|  | ILE238 |  | PHE91  |  | LYS98  |  | GLY260 |
|  | THR241 |  | THR94  |  | ILE99  |  | LEU279 |
|  | ASN245 |  | SER98  |  | PRO100 |  | TYR280 |
|  |        |  | TYR102 |  | LYS102 |  | ASP283 |
|  |        |  | PHE103 |  | TYR103 |  | GLY288 |
|  |        |  | GLY106 |  | LEU104 |  | LEU291 |
|  |        |  | GLY109 |  | GLU105 |  | ARG292 |
|  |        |  | CYS110 |  | ILE107 |  | LEU293 |
|  |        |  | GLU113 |  | SER108 |  | GLN295 |
|  |        |  | GLY114 |  | ILE111 |  | GLU296 |
|  |        |  | PHE116 |  | HIS119 |  | GLN336 |
|  |        |  | ALA117 |  | PHE123 |  | ASN338 |

|  |  |        |  |               |  |        |
|--|--|--------|--|---------------|--|--------|
|  |  | THR118 |  | ALA130        |  | ASP339 |
|  |  | GLY120 |  | <b>MET131</b> |  | THR340 |
|  |  | GLY121 |  | ALA134        |  | HIS341 |
|  |  | GLU122 |  | LEU135        |  | PRO342 |
|  |  | LEU125 |  | GLU136        |  | GLU348 |
|  |  | TRP126 |  | LEU137        |  | LEU353 |
|  |  | LEU128 |  | PHE138        |  | ASP355 |
|  |  | VAL129 |  | ARG139        |  | ALA364 |
|  |  | LEU131 |  | ASP141        |  | THR375 |
|  |  | GLU134 |  | ALA143        |  | ASN376 |
|  |  | ARG135 |  | TYR146        |  | HIS377 |
|  |  | VAL138 |  | LEU149        |  | THR378 |
|  |  | CYS140 |  | GLY150        |  | GLU382 |
|  |  | LYS141 |  | GLY153        |  | ALA383 |
|  |  | PRO142 |  |               |  | LEU384 |
|  |  | ASN145 |  |               |  | GLU385 |
|  |  | PHE146 |  |               |  | ARG398 |
|  |  | ARG147 |  |               |  | ILE403 |
|  |  | PHE148 |  |               |  | ILE406 |
|  |  | HIS152 |  |               |  | MET441 |
|  |  | ALA153 |  |               |  | ALA442 |
|  |  | GLY156 |  |               |  | LEU444 |
|  |  | TRP161 |  |               |  | ASN453 |
|  |  | MET163 |  |               |  | GLY454 |
|  |  | ALA164 |  |               |  | VAL455 |
|  |  | CYS167 |  |               |  | HIS459 |
|  |  | PRO171 |  |               |  | SER460 |
|  |  | GLY174 |  |               |  | PRO476 |
|  |  | TRP175 |  |               |  | PHE479 |
|  |  | SER176 |  |               |  | ASN481 |
|  |  | ARG177 |  |               |  | THR483 |
|  |  | TYR178 |  |               |  | ASN484 |
|  |  | ILE179 |  |               |  | GLY485 |
|  |  | PRO180 |  |               |  | THR487 |
|  |  | GLY182 |  |               |  | ARG489 |
|  |  | GLN184 |  |               |  | ARG490 |
|  |  | CYS185 |  |               |  | TRP491 |
|  |  | SER186 |  |               |  | LEU499 |
|  |  | CYS187 |  |               |  | LYS538 |
|  |  | GLY188 |  |               |  | LYS542 |
|  |  | ASN200 |  |               |  | PHE563 |
|  |  | SER202 |  |               |  | ASP564 |
|  |  | PHE203 |  |               |  | LYS568 |
|  |  | VAL204 |  |               |  | ARG569 |
|  |  | TYR206 |  |               |  | HIS571 |
|  |  | MET207 |  |               |  | TYR573 |

|  |  |               |  |  |               |
|--|--|---------------|--|--|---------------|
|  |  | PHE208        |  |  | LYS574        |
|  |  | HIS211        |  |  | ARG575        |
|  |  | PHE212        |  |  | GLN576        |
|  |  | PRO215        |  |  | ASN579        |
|  |  | PHE221        |  |  | PRO600        |
|  |  | CYS222        |  |  | GLY607        |
|  |  | TYR223        |  |  | <b>LYS608</b> |
|  |  | GLY224        |  |  | ALA609        |
|  |  | LEU226        |  |  | ALA610        |
|  |  | VAL230        |  |  | PRO611        |
|  |  | LYS231        |  |  | TYR613        |
|  |  | ALA233        |  |  | ALA616        |
|  |  | ALA235        |  |  | LYS617        |
|  |  | THR243        |  |  | ILE619        |
|  |  | GLN244        |  |  | ILE620        |
|  |  | ALA246        |  |  | ILE626        |
|  |  | GLU247        |  |  | ASN631        |
|  |  | GLU249        |  |  | ASP633        |
|  |  | VAL250        |  |  | VAL642        |
|  |  | ARG252        |  |  | PHE644        |
|  |  | MET253        |  |  | TYR648        |
|  |  | VAL254        |  |  | VAL650        |
|  |  | MET257        |  |  | ALA653        |
|  |  | <b>PHE261</b> |  |  | PRO658        |
|  |  | LEU262        |  |  | ASP661        |
|  |  | CYS264        |  |  | SER663        |
|  |  | <b>TRP265</b> |  |  | GLN665        |
|  |  | PRO267        |  |  | ILE666        |
|  |  | <b>TYR268</b> |  |  | SER667        |
|  |  | ALA269        |  |  | THR668        |
|  |  | VAL271        |  |  | ALA669        |
|  |  | ALA272        |  |  | GLY670        |
|  |  | ILE275        |  |  | GLU672        |
|  |  | PHE276        |  |  | ALA673        |
|  |  | GLN279        |  |  | SER674        |
|  |  | GLY280        |  |  | GLY675        |
|  |  | PHE283        |  |  | THR676        |
|  |  | PRO285        |  |  | GLY677        |
|  |  | PHE287        |  |  | ASN678        |
|  |  | MET288        |  |  | MET679        |
|  |  | THR289        |  |  | LYS680        |
|  |  | PRO291        |  |  | ASN684        |
|  |  | <b>PHE293</b> |  |  | GLY685        |
|  |  | PHE294        |  |  | LEU687        |
|  |  | ALA295        |  |  | ILE689        |
|  |  | LYS296        |  |  | GLY690        |

|  |  |  |               |  |  |  |        |
|--|--|--|---------------|--|--|--|--------|
|  |  |  | <b>TYR301</b> |  |  |  | THR691 |
|  |  |  | ASN302        |  |  |  | ASP693 |
|  |  |  | PRO303        |  |  |  | GLY694 |
|  |  |  | ILE305        |  |  |  | ALA695 |
|  |  |  | TYR306        |  |  |  | ASN696 |
|  |  |  | ILE307        |  |  |  | GLU698 |
|  |  |  | ASN310        |  |  |  | GLY704 |
|  |  |  | <b>GLN312</b> |  |  |  | ASN707 |
|  |  |  | ARG314        |  |  |  | PHE711 |
|  |  |  | CYS316        |  |  |  | GLY712 |
|  |  |  | GLY324        |  |  |  | VAL718 |
|  |  |  | ASN326        |  |  |  | ASP769 |
|  |  |  | VAL345        |  |  |  | ASP776 |
|  |  |  |               |  |  |  | TYR780 |
|  |  |  |               |  |  |  | TRP797 |
|  |  |  |               |  |  |  | PHE811 |
|  |  |  |               |  |  |  | SER812 |
|  |  |  |               |  |  |  | SER813 |
|  |  |  |               |  |  |  | ASP814 |
|  |  |  |               |  |  |  | ARG815 |
|  |  |  |               |  |  |  | ILE817 |
|  |  |  |               |  |  |  | TYR820 |
|  |  |  |               |  |  |  | ILE824 |
|  |  |  |               |  |  |  | TRP825 |

| <b>1bz0</b>   |                            |                            | <b>1g5y</b>   |                  | <b>1kzk</b>  |                  |
|---------------|----------------------------|----------------------------|---------------|------------------|--------------|------------------|
| <b>CICDs</b>  | <b>CONSERVED (CHAIN A)</b> | <b>CONSERVED (CHAIN B)</b> | <b>CICDs</b>  | <b>CONSERVED</b> | <b>CICDs</b> | <b>CONSERVED</b> |
| <b>Phe98</b>  | VAL1                       | VAL1                       | <b>Glu307</b> | VAL232           | Ile85        | PRO1             |
| <b>Lys99</b>  | LEU2                       | HIS2                       | Leu353        | CYS269           | <b>Arg87</b> | PRO9             |
| <b>His103</b> | SER3                       | LEU3                       | Leu420        | LEU276           |              | LEU23            |
| <b>Arg141</b> | ASP6                       | THR4                       | Ala424        | ALA283           |              | ASP25            |
| <b>Gln131</b> | LYS7                       | GLU7                       | <b>Arg426</b> | PHE289           |              | THR26            |
| <b>Tyr145</b> | TRP14                      | LYS8                       |               | ASP296           |              | GLY27            |
|               | GLY18                      | VAL11                      |               | GLN297           |              | ALA28            |
|               | TYR24                      | LEU14                      |               | LEU300           |              | GLY49            |
|               | GLY25                      | TRP15                      |               | TRP305           |              | GLY52            |
|               | ALA28                      | LYS17                      |               | <b>GLU307</b>    |              | PRO81            |
|               | LEU29                      | VAL18                      |               | LEU308           |              | GLY86            |
|               | GLU30                      | ASN19                      |               | LEU309           |              | <b>ARG87</b>     |
|               | ARG31                      | VAL20                      |               | VAL354           |              | PHE99            |
|               | PHE33                      | VAL23                      |               | ASP363           |              |                  |
|               | PRO37                      | GLY24                      |               | GLU366           |              |                  |
|               | THR38                      | GLY25                      |               | ARG371           |              |                  |
|               | THR39                      | GLU26                      |               | ALA372           |              |                  |

|  |               |       |  |               |  |  |
|--|---------------|-------|--|---------------|--|--|
|  | LYS40         | LEU28 |  | ASP379        |  |  |
|  | THR41         | GLY29 |  | ARG393        |  |  |
|  | TYR42         | ARG30 |  | LEU400        |  |  |
|  | PHE43         | LEU31 |  | ARG414        |  |  |
|  | PRO44         | LEU32 |  | LEU419        |  |  |
|  | PHE46         | VAL34 |  | LEU422        |  |  |
|  | HIS50         | TYR35 |  | PRO423        |  |  |
|  | GLY51         | PRO36 |  | LEU425        |  |  |
|  | SER52         | TRP37 |  | <b>ARG426</b> |  |  |
|  | GLN54         | THR38 |  | GLY443        |  |  |
|  | VAL55         | GLN39 |  | PRO458        |  |  |
|  | HIS58         | ARG40 |  |               |  |  |
|  | GLY59         | PHE42 |  |               |  |  |
|  | LYS61         | SER44 |  |               |  |  |
|  | VAL62         | PHE45 |  |               |  |  |
|  | ALA65         | GLY46 |  |               |  |  |
|  | LEU66         | LEU48 |  |               |  |  |
|  | ALA69         | SER49 |  |               |  |  |
|  | ASP74         | ALA53 |  |               |  |  |
|  | PRO77         | MET55 |  |               |  |  |
|  | LEU83         | ASN57 |  |               |  |  |
|  | SER84         | LYS59 |  |               |  |  |
|  | ASP85         | VAL60 |  |               |  |  |
|  | LEU86         | LYS61 |  |               |  |  |
|  | HIS87         | ALA62 |  |               |  |  |
|  | ALA88         | HIS63 |  |               |  |  |
|  | LYS90         | GLY64 |  |               |  |  |
|  | LEU91         | LYS65 |  |               |  |  |
|  | VAL93         | LYS66 |  |               |  |  |
|  | ASP94         | VAL67 |  |               |  |  |
|  | PRO95         | LEU68 |  |               |  |  |
|  | VAL96         | PHE71 |  |               |  |  |
|  | ASN97         | SER72 |  |               |  |  |
|  | <b>PHE98</b>  | GLY74 |  |               |  |  |
|  | <b>LYS99</b>  | LEU75 |  |               |  |  |
|  | LEU100        | LEU78 |  |               |  |  |
|  | LEU101        | ASP79 |  |               |  |  |
|  | <b>HIS103</b> | LEU81 |  |               |  |  |
|  | LEU105        | LYS82 |  |               |  |  |
|  | LEU106        | THR84 |  |               |  |  |
|  | VAL107        | PHE85 |  |               |  |  |
|  | THR108        | LEU88 |  |               |  |  |
|  | ALA110        | SER89 |  |               |  |  |
|  | PHE117        | GLU90 |  |               |  |  |
|  | THR118        | LEU91 |  |               |  |  |
|  | PRO119        | HIS92 |  |               |  |  |
|  | ALA120        | CYS93 |  |               |  |  |

|  |        |               |  |  |  |  |
|--|--------|---------------|--|--|--|--|
|  | HIS122 | LEU96         |  |  |  |  |
|  | ALA123 | HIS97         |  |  |  |  |
|  | SER124 | VAL98         |  |  |  |  |
|  | ASP126 | ASP99         |  |  |  |  |
|  | LYS127 | PRO100        |  |  |  |  |
|  | PHE128 | GLU101        |  |  |  |  |
|  | VAL132 | ASN102        |  |  |  |  |
|  | THR134 | PHE103        |  |  |  |  |
|  | VAL135 | LEU105        |  |  |  |  |
|  | LEU136 | LEU106        |  |  |  |  |
|  | SER138 | GLY107        |  |  |  |  |
|  | LYS139 | ASN108        |  |  |  |  |
|  | TYR140 | VAL109        |  |  |  |  |
|  | ARG141 | LEU110        |  |  |  |  |
|  |        | VAL111        |  |  |  |  |
|  |        | CYS112        |  |  |  |  |
|  |        | VAL113        |  |  |  |  |
|  |        | LEU114        |  |  |  |  |
|  |        | ALA115        |  |  |  |  |
|  |        | PHE118        |  |  |  |  |
|  |        | GLY119        |  |  |  |  |
|  |        | LYS120        |  |  |  |  |
|  |        | GLU121        |  |  |  |  |
|  |        | PHE122        |  |  |  |  |
|  |        | THR123        |  |  |  |  |
|  |        | PRO124        |  |  |  |  |
|  |        | GLN127        |  |  |  |  |
|  |        | ALA128        |  |  |  |  |
|  |        | ALA129        |  |  |  |  |
|  |        | <b>GLN131</b> |  |  |  |  |
|  |        | LYS132        |  |  |  |  |
|  |        | VAL133        |  |  |  |  |
|  |        | VAL134        |  |  |  |  |
|  |        | ALA135        |  |  |  |  |
|  |        | GLY136        |  |  |  |  |
|  |        | VAL137        |  |  |  |  |
|  |        | ALA138        |  |  |  |  |
|  |        | ALA140        |  |  |  |  |
|  |        | LEU141        |  |  |  |  |
|  |        | ALA142        |  |  |  |  |
|  |        | HIS143        |  |  |  |  |
|  |        | LYS144        |  |  |  |  |
|  |        | <b>TYR145</b> |  |  |  |  |
|  |        | HIS146        |  |  |  |  |

**Table II** Comparison between the CICDs and sequence conserved residues for each protein family. CICD residues, which are sequence conserved, are shown in bold type characters. Solvent accessible residues are indicated with dark grey shading.

Table III

| Protein                          | PDB ID | Predicted residues                                   | Clustering |
|----------------------------------|--------|------------------------------------------------------|------------|
| acylphosphatase                  | 1aps   | <b>11</b>                                            | --         |
| serine proteinase inhibitor CI-2 | 2ci2   | 67<br><b>80</b>                                      | Yes        |
| major cold shock protein         | 1mjc   | <b>21</b><br>32<br><b>67</b>                         | Yes        |
| tenascin                         | 1ten   | 833<br><b>835</b><br>837<br><b>871</b><br><b>873</b> | Yes        |
| prolactin                        | 1f6f   | 176<br><b>180</b>                                    | Yes        |

**Table III** CICD residues corresponding to five examples of non-allosteric proteins. Experimentally verified key residues for protein folding are shown in bold characters. The predicted CICDs form clusters belonging to the protein folding nuclei. Experimental data for these proteins was obtained as follows: 1mjc (de Bono *et al*, 2005), 1f6f (Sami *et al*, 1999), 1ten (Mirny & Shakhnovich, 1999), 1aps (Vendruscolo *et al*, 2002), 2ci2 (Dokholyan *et al*, 2005).

Figure 1

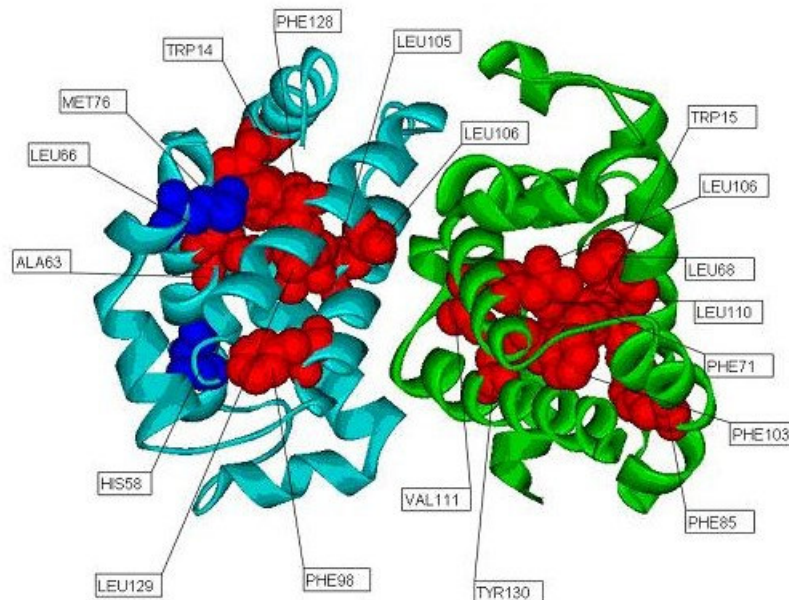

**Figure 1** CICD residues of the T and R state structures of the alpha-beta homodimer of human hemoglobin depicted in the oxygenated state (R state). The two subunits are colored in blue and green (alpha and beta, respectively). The CICD residues predicted that overlap in both states (T and R) are shown in red. CICD residues only predicted in R state are depicted in blue.



Figure 2a

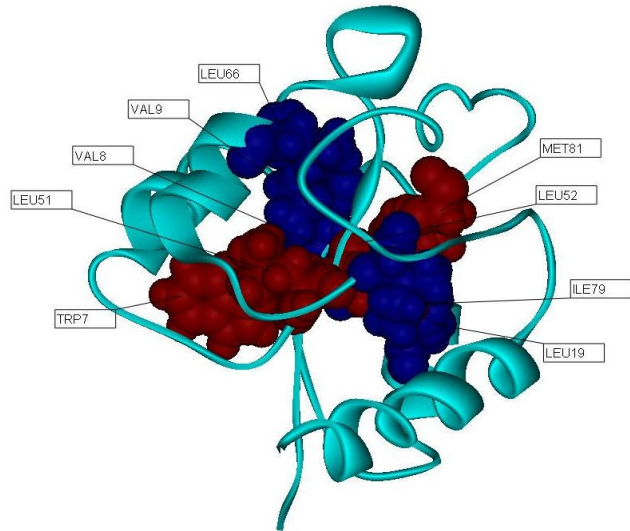

Figure 2b

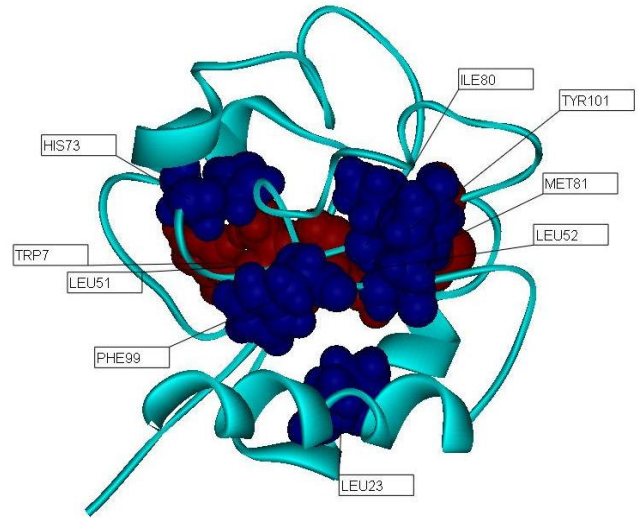

**Figure 2(a)** Representation of the inactive state of the Nitrogen regulator I protein (NtrC, PDB ID 1dc7). The central residues in both states are shown in red. The residues predicted only in the inactive state are depicted in blue. **(b)** Mapping of the central residues onto the active state of the NtrC (PDB ID 1dc8). The central residues in both states are shown in red. The residues predicted only in the inactive state are depicted in blue.

Figure 3

**2ptcE**

|       |             |            |            |            |            |
|-------|-------------|------------|------------|------------|------------|
| 1hj8A | IVGGYECKAY  | SQPHQVSLN. | SGYHFCGGSL | VNENWVVSAA | HCYKSRVEVR |
| 1h4wA | IVGGYTCEEN  | SLPYQVSLN. | SGSHFCGGSL | ISEQWVVSAA | HCYKTRIQVR |
| 1mctA | IVGGYTCAAN  | SIPYQVSLN. | SGSHFCGGSL | INSQWVVSAA | HCYKSRIQVR |
| 1tawA | IVGGYTTCGAN | TVPYQVSLN. | SGYHFCGGSL | INSQWVVSAA | HCYKSGIQVR |
| 1tpaE | IVGGYTTCGAN | TVPYQVSLN. | SGYHFCGGSL | INSQWVVSAA | HCYKSGIQVR |
| 2ptcE | IVGGYTTCGAN | TVPYQVSLN. | SGYHFCGGSL | INSQWVVSAA | HCYKSGIQVR |
| 1trnA | IVGGYNCEEN  | SVPYQVSLN. | SGYHFCGGSL | INEQWVVSAG | HCYKSRIQVR |
| 3tgiE | IVGGYTQCEN  | SVPYQVSLN. | SGYHFCGGSL | INDQWVVSAA | HCYKSRIQVR |

|       |            |            |            |            |            |
|-------|------------|------------|------------|------------|------------|
| 1hj8A | LGEHNIKVTE | GSEQFISSSR | VIRHPNYSSY | NIDNDIMLIK | LSKPATLNTY |
| 1h4wA | LGEHNIKVLE | GNEQFINAVK | IIRHPKYNRD | TLDNDIMLIK | LSSPAVINAR |
| 1mctA | LGEHNIDVLE | GNEQFINAAK | IITHPNFNGN | TLDNDIMLIK | LSSPATLNSR |
| 1tawA | LGEDNINVVE | GNEQFISASK | SIVHPSYNSN | TLNNDIMLIK | LKSAASLNSR |
| 1tpaE | LGEDNINVVE | GNEQFISASK | SIVHPSYNSN | TLNNDIMLIK | LKSAASLNSR |
| 2ptcE | LGEDNINVVE | GNEQFISASK | SIVHPSYNSN | TLNNDIMLIK | LKSAASLNSR |
| 1trnA | LGEHNIEVLE | GNEQFINAAK | IIRHPQYDRK | TLNNDIMLIK | LSSRAVINAR |
| 3tgiE | LGEHNINVLE | GNEQFVNAAK | IIKHPNFDRK | TLNNDIMLIK | LSSPVKLNAR |

|       |            |            |            |            |            |
|-------|------------|------------|------------|------------|------------|
| 1hj8A | V..QPVALPT | SCAPAGTMCT | VSGWGNTMSS | .TADSNKLQC | LNIPILSYSD |
| 1h4wA | V..STISLPT | APPAAGTECL | ISGWGNTLSF | GADYPDELKC | LDAPVLTQAE |
| 1mctA | V..ATVSLPR | SCAAAGTECL | ISGWGNTKSS | GSSYPSLLQC | LKAPVLSNSS |
| 1tawA | V..ASISLPT | SCASAGTQCL | ISGWGNTKSS | GTSYPDVLKC | LKAPILSTSS |

|       |            |            |            |            |            |
|-------|------------|------------|------------|------------|------------|
| 1tpaE | V..ASISLPT | SCASAGTQCL | ISGWGNTKSS | GTSYPDVLKC | LKAPILSDSS |
| 2ptcE | V..ASISLPT | SCASAGTQCL | ISGWGNTKSS | GTSYPDVLKC | LKAPILSDSS |
| 1trnA | V..STISLPT | APPATGTKCL | ISGWGNTASS | GADYPDELQC | LDAPVLSQAK |
| 3tgiE | V..ATVALPS | SCAPAGTQCL | ISGWGNTLSS | GVNEPDLLQC | LDAPLLPQAD |

|       |            |            |            |            |             |
|-------|------------|------------|------------|------------|-------------|
| 1hj8A | CNNSYPGMIT | NAMFCA.YLE | G.KDSCQGDS | GGPVVCNGEL | QGVVSWGYGC  |
| 1h4wA | CKASYPGKIT | NSMFCV.GLE | G.GDSCQRDS | GGPVVCNGQL | QGVVSWG HGC |
| 1mctA | CKSSYPGQIT | GNMICV.FLQ | G.KDSCQGDS | GGPVVCNGQL | QGIVSWG YGC |
| 1tawA | CKSAYPGQIT | SNMFCA.YLE | G.KDSCQGDS | GGPVVCSGKL | QGIVSWGSGC  |
| 1tpaE | CKSAYPGQIT | SNMFCA.YLE | G.KDSCQGDS | GGPVVCSGKL | QGIVSWGSGC  |
| 2ptcE | CKSAYPGQIT | SNMFCA.YLE | G.KDSCQGDS | GGPVVCSGKL | QGIVSWGSGC  |
| 1trnA | CEASYPGKIT | SNMFCV.FLE | G.KDSCQGDS | GGPVVCNGQL | QGVVSWG DGC |
| 3tgiE | CEASYPGKIT | DNMVCV.GLE | G.GDSCQGDS | GGPVVCNGEL | QGIVSWG YGC |

|       |            |            |         |  |  |
|-------|------------|------------|---------|--|--|
| 1hj8A | .EPGNPGVYA | KVCIFNDWLT | STMASY. |  |  |
| 1h4wA | .AKNRPGVYT | KVYNYVDWIK | DTIAANS |  |  |
| 1mctA | .QKNKPGVYT | KVCNYVNWIQ | QTIAAN. |  |  |
| 1tawA | .QKNKPGVYT | KVCNYVSWIK | QTIASN. |  |  |
| 1tpaE | .QKNKPGVYT | KVCNYVSWIK | QTIASN. |  |  |
| 2ptcE | .QKNKPGVYT | KVCNYVSWIK | QTIASN. |  |  |
| 1trnA | .QKNKPGVYT | KVYNYVKWIK | NTIAANS |  |  |
| 3tgiE | .APDNPGVYT | KVCNYVDWIQ | DTIAAN. |  |  |

**119hA**

|       |            |            |            |            |            |
|-------|------------|------------|------------|------------|------------|
| 119hA | MNGTEGPNFY | VPFSNKTGVV | RSPFEAPQYY | LAEPWQFSML | AAYMFLLIML |
| 1f88A | MNGTEGPNFY | VPFSNKTGVV | RSPFEAPQYY | LAEPWQFSML | AAYMFLLIML |
| 1hzxA | MNGTEGPNFY | VPFSNKTGVV | RSPFEAPQYY | LAEPWQFSML | AAYMFLLIML |
| 1ln6A | .....      | .....      | .....      | .....L     | AAYMFLLIML |

|       |            |            |            |            |            |
|-------|------------|------------|------------|------------|------------|
| 119hA | GFPINFLTLY | VTVQHKKLRT | PLNYILLNLA | VADLFMVFGG | FTTTLYTSLH |
| 1f88A | GFPINFLTLY | VTVQHKKLRT | PLNYILLNLA | VADLFMVFGG | FTTTLYTSLH |
| 1hzxA | GFPINFLTLY | VTVQHKKLRT | PLNYILLNLA | VADLFMVFGG | FTTTLYTSLH |
| 1ln6A | GFPINFLTLY | VTVQHKKLRT | PLNYILLNLA | VADLFMVFGG | FTTTLYTSLH |

|       |            |            |             |            |            |
|-------|------------|------------|-------------|------------|------------|
| 119hA | GYFVFGPTGC | NLEGFFATLG | GEIALWLSLVV | LAIERYVVVC | KPMSNFRFGE |
| 1f88A | GYFVFGPTGC | NLEGFFATLG | GEIALWLSLVV | LAIERYVVVC | KPMSNFRFGE |
| 1hzxA | GYFVFGPTGC | NLEGFFATLG | GEIALWLSLVV | LAIERYVVVC | KPMSNFRFGE |
| 1ln6A | GYFVFGPTGC | NLEGFFATLG | GEIALWLSLVV | LAIERYVVVC | KPMSNFRFGE |

|       |            |            |            |            |            |
|-------|------------|------------|------------|------------|------------|
| 119hA | NHAIMGVAFT | WVMALACAAP | PLVGWSRYIP | EGMQCSCGID | YYTPHEETNN |
| 1f88A | NHAIMGVAFT | WVMALACAAP | PLVGWSRYIP | EGMQCSCGID | YYTPHEETNN |
| 1hzxA | NHAIMGVAFT | WVMALACAAP | PLVGWSRYIP | EGMQCSCGID | YYTPHEETNN |
| 1ln6A | NHAIMGVAFT | WVMALACAAP | PLVGWSRYIP | EGMQCSCGID | YYTPHEETNN |

|       |            |            |            |             |            |
|-------|------------|------------|------------|-------------|------------|
| 119hA | ESFVIYMFVV | HFIIPLIVIF | FCYQQLVFTV | KEAAA.....  | ATTQKAEKEV |
| 1f88A | ESFVIYMFVV | HFIIPLIVIF | FCYQQLVFTV | KEAAA.....S | ATTQKAEKEV |
| 1hzxA | ESFVIYMFVV | HFIIPLIVIF | FCYQQLVFTV | KEAAA.....  | ATTQKAEKEV |
| 1ln6A | ESFVIYMFVV | HFIIPLIVIF | FCYQQLVFTV | KEAAAQQQES  | ATTQKAEKEV |

|       |            |            |            |            |            |
|-------|------------|------------|------------|------------|------------|
| 119hA | TRMVIIMVIA | FLICWLPYAG | VAFYIFTHQG | SDFGPIFMTI | PAFFAKTSAV |
| 1f88A | TRMVIIMVIA | FLICWLPYAG | VAFYIFTHQG | SDFGPIFMTI | PAFFAKTSAV |
| 1hzxA | TRMVIIMVIA | FLICWLPYAG | VAFYIFTHQG | SDFGPIFMTI | PAFFAKTSAV |
| 11n6A | TRMVIIMVIA | FLICWLPYAG | VAFYIFTHQG | SDFGPIFMTI | PAFFAKTSAV |

|       |            |            |            |            |          |
|-------|------------|------------|------------|------------|----------|
| 119hA | YNPVIYIMMN | KQFRNCMVTT | LCCGKNPLGD | ...STTVSKT | ETSQVAPA |
| 1f88A | YNPVIYIMMN | KQFRNCMVTT | LCCGKNP... | ...STTVSKT | ETSQVAPA |
| 1hzxA | YNPVIYIMMN | KQFRNCMVTT | LCCGKNPLGD | ...STTVSKT | ETSQVAPA |
| 11n6A | YNPVIYIMMN | KQFRNCMVTT | LCCGKNPLGD | DEASTTVSKT | ETSQVAPA |

### 1bz0A

|       |            |             |            |            |            |
|-------|------------|-------------|------------|------------|------------|
| 1bz0A | VLSPADKTNV | KAAWGKVGGAH | AGEYGAEALE | RMFLSFPTTK | TYFPHF.DLS |
| 1hdaA | VLSAADKGNV | KAAWGKVGGAH | AAEYGAEALE | RMFLSFPTTK | TYFPHF.DLS |
| 1fhjA | VLSPADKTNV | KSTWDKIGGH  | AGDYGGEALD | RTFQSFPTTK | TYFPHF.DLS |
| 1hbhA | SLSDKDKAAV | RALWSKIGKS  | ADAIGNDALS | RMIVVYPQTK | TYFSHPDVT  |
| 1hbrA | MLTAEDKKLI | QQAWEKAASH  | QEEFGAEALT | RMFTTYPQTK | TYFPHF.DLS |
| 1hv4A | VLSPADKTNV | KGVFSKISGH  | AAEYGAEALE | RMFTTYPQTK | TYFPHF.DLQ |
| 1hdsA | VLSAANKSNV | KAAWGKVGGAH | APAYGAQALQ | RMFLSFPTTK | TYFPHF.DLS |
| 2pghA | VLSAADKANV | KAAWGKVGGAH | AGAHGAEALE | RMFLGFPTTK | TYFPHF.NLS |
| 1gcvA | AFTACEKQTI | GKIAQVLAKS  | PEAYGAECLA | RLFVTHPGSK | SYFEYK.DYS |

|       |            |            |            |            |            |
|-------|------------|------------|------------|------------|------------|
| 1bz0A | HGSAQVKGHG | KKVADALTNA | VAHVDDMPNA | LSALSDLHAH | KLRVDPVNFK |
| 1hdaA | HGSAQVKGHG | AKVAAALTKA | VEHLDDLPGA | LSELSDLHAH | KLRVDPVNFK |
| 1fhjA | PGSAQVKAHG | KKVADALTNA | VAHLDDLPGA | LSALSDLHAY | KLRVDPVNFK |
| 1hbhA | PGSPHIKAHG | KKVMGGIALA | VSKIDDLKTG | LMELSEQHAY | KLRVDPANFK |
| 1hbrA | PGSDQVRGHG | KKVLGALGNA | VKNVDNLSQA | MAELSNLHAY | NLRVDPVNFK |
| 1hv4A | HGSAQVKAHG | KKVVAALVEA | VNHIDDIAGA | LSKLSDLHAQ | KLRVDPVNFK |
| 1hdsA | HGSAQVKAHG | QKVANALTKA | QGHLNDLPGT | LSNLSNLHAH | KLRVNPVNFK |
| 2pghA | HGSDQVKAHG | QKVADALTNA | VGHLDDLPGA | LSALSDLHAH | KLRVDPVNFK |
| 1gcvA | AAGAKVQVHG | GKVIRAVVKA | AEHVDDLHSH | LETLALTHGK | KLLVDPQNF  |

|       |            |            |            |            |    |
|-------|------------|------------|------------|------------|----|
| 1bz0A | LLSHCLLVTL | AAHLPAEFTP | AVHASLKDFL | ASVSTVLTSK | YR |
| 1hdaA | LLSHCLLVTL | ASHLPSDFTP | AVHASLKDFL | ANVSTVLTSK | YR |
| 1fhjA | LLSHCLLVTL | ACHHPTEFTP | AVHASLKDFF | TAVSTVLTSK | YR |
| 1hbhA | ILNHCILVVI | STMFPKEFTP | EAHVSLKDFL | SGVALALAER | YR |
| 1hbrA | LLSQCIQVVL | AVHMGKDYTP | EVHAAFDFKL | SAVSAVLAEK | YR |
| 1hv4A | FLGHCFLLVV | AIHHPALTA  | EVHASLKDFL | CAVGTVLTA  | YR |
| 1hdsA | LLSHCLLVTL | ASHLPTNFTP | AVHANLNKFL | ANDSTVLTSK | YR |
| 2pghA | LLSHCLLVTL | AAHHPDDFNP | SVHASLKDFL | ANVSTVLTSK | YR |
| 1gcvA | MLSECIIVTL | ATHLT.EFSP | DTHCAVDKLL | SAICQELSSR | YR |

### 1bz0B

|       |            |            |            |            |            |
|-------|------------|------------|------------|------------|------------|
| 1bz0B | VHLTPEEKSA | VTALWGKVVV | DEVGGEALGR | LLVVYPWTQR | FFESFGDLST |
| 1fhjB | VHLTAEKSL  | VSGLWGKVVV | DEVGGEALGR | LLIVYPWTQR | FFDSFGDLST |
| 2pghB | VHLSAEEKEA | VLGLWGKVVV | DEVGGEALGR | LLVVYPWTQR | FFESFGDLSN |
| 1hbhB | VEWTDKERSI | ISDIFSHMDY | DDIGPKALSR | CLIVYPWTQR | HFSGFGNLYN |

|       |            |            |             |            |            |
|-------|------------|------------|-------------|------------|------------|
| 1hbrB | VHWTAEKQQL | ITGLWGKVVN | AECGAEALAR  | LLIVYPWTQR | FFASFGNLSS |
| 1hv4B | VHWSAEKQQL | ITGLWGKVVN | ADCGAEALAR  | LLIVYPWTQR | FFSSFGNLSS |
| 1hdsB | .MLTAEKAA  | VTGFWGKVDV | DVVGAAQALGR | LLVVYPWTQR | FFQHFGNLSS |
| 1hdaB | .MLTAEKAA  | VTAFWGKVKV | DEVGGEALGR  | LLVVYPWTQR | FFESFGDLST |
| 1gcvB | VHWTQEERDE | ISKTFQGTDM | KTVVTQALDR  | MFKVYPWTNR | YFQKRTDF.. |

|       |            |            |            |            |            |
|-------|------------|------------|------------|------------|------------|
| 1bz0B | PDAVMGNPKV | KAHGKVKLGA | FSDGLAHLDN | LKGTfATLSE | LHCDKLHVDP |
| 1fhjB | PDAVMSNAKV | KAHGKVKLNS | FSDGLKNLDN | LKGTfAKLSE | LHCDKLHVDP |
| 2pghB | ADAVMGNPKV | KAHGKVKLQS | FSDGLKHLDN | LKGTfAKLSE | LHCDQLHVDP |
| 1hbbB | AEAIIGNANV | AAHGKVKLHG | LDRGVKNMDN | IAATYADLST | LHSEKLHVDP |
| 1hbrB | PTAILGNPMV | RAHGKVKLTS | FGDAVKNLDN | IKNTfSQLSE | LHCDKLHVDP |
| 1hv4B | PTAILGNPMV | RAHGKVKLTS | FGDAVKNLDN | IKNTfAQLSE | LHCDKLHVDP |
| 1hdsB | AGAVMNNPKV | KAHGKRVLDA | FTQGLKHLDD | LKGAFaQLSG | LHCNKLHVNP |
| 1hdaB | ADAVMNNPKV | KAHGKVKLDS | FsNGMKHLDD | LKGTfAALSE | LHCDKLHVDP |
| 1gcvB | .....RS    | SIHAGIVVGA | LQDAVKHMDD | VKTLfKDLSK | KHADDLHVDP |

|       |             |            |            |            |        |
|-------|-------------|------------|------------|------------|--------|
| 1bz0B | ENFRLLGNVL  | VCVLAHHFGK | EFTPPVQAAY | QKVVAGVANA | LAHKYH |
| 1fhjB | ENFKLLGNVL  | VCVLAHHFGK | EFTPQVQAAY | QKVVAGVANA | LAHKYH |
| 2pghB | ENFRLLGNVI  | VVVLARRLGH | DFNPDVQAAF | QKVVAGVANA | LAHKYH |
| 1hbbB | DNFKLLSDCI  | TIVLAAKMGH | AFTAETQGAF | QKFLAVVvSA | LGKQYH |
| 1hbrB | ENFRLLGDIL  | IIVLAAHFSK | DFTPECQAAW | QKLVRVVAHA | LAR... |
| 1hv4B | ENFRLLGDIL  | IIVLAAHFAK | EFTPDCQAAW | QKLVRVVAHA | LARKYH |
| 1hdsB | QNFRRLLGNVL | ALVVARNFVG | QFTPNVQALF | QKVVAGVANA | LAHKYH |
| 1hdaB | ENFKLLGNVL  | VVVLARNFGK | EFTPVlQADF | QKVVAGVANA | LAHRYH |
| 1gcvB | GSFHLLTDCI  | IVELAYLRKD | CFTPHIQGIW | DKFFEvVIDA | ISKQYH |

**101m**

|        |            |            |            |            |            |
|--------|------------|------------|------------|------------|------------|
| 1EMY__ | .GLSDGEWEL | VLKTWGKVEA | DIPGHGETVF | VRLFTGHPET | LEKFDKFKHL |
| 1J52_A | MVLSEGEWQL | VLHVWAKVEA | DVAGHGQDIL | IRLFKSHPET | LEKFDKFKHL |
| 1LHT__ | .GLSDDEWNH | VLGIWAKVEP | DLsAHGQEVl | IRLFQLHPET | QERfAKFKNL |
| 1MBA__ | XSLsAAEADL | AGKsWAPVFA | NKNANGLDFL | VALFEKFPDS | ANFFADFKG. |
| 1MBS__ | .GLSDGEWHL | VLNVWGKVET | DLAGHGQEVl | IRLFKSHPET | LEKFDKFKHL |
| 1MWC_A | .GLSDGEWQL | VLNVWGKVEA | DVAGHGQEVl | IRLFKSHPET | LEKFDKFKHL |
| 1MYT__ | .....ADFDA | VLKcWGPVEA | DYTTMGGLVL | TRLFKEHPET | QKLFPKfAGI |
| 2MM1__ | .GLSDGEWQL | VLNVWGKVEA | DIPGHGQEVl | IRLFKSHPET | LEKFDKFKHL |
| 101M__ | MVLSEGEWQL | VLHVWAKVEA | DVAGHGQDIL | IRLFKSHPET | LEKFDKFKHL |
| 1GJN_A | .GLSDGEWQQ | VLNVWGKVEA | DIAGHGQEVl | IRLFTGHPET | LEKFDKFKHL |

|        |            |            |            |            |            |
|--------|------------|------------|------------|------------|------------|
| 1EMY__ | KTEGEMKASE | DLKKQGVTVL | TALGGILKKK | ...GHHEAEI | QPLAQSHATK |
| 1J52_A | KTEAEMKASE | DLKKHGVTVL | TALGAILKKK | ...GHHEAEL | KPLAQSHATK |
| 1LHT__ | TTIDALKSSE | EVKKHGTTVL | TALGRILKQK | ...NNHEQEL | KPLAESHATK |
| 1MBA__ | KSVADIKASP | KLRDVSSRIF | TRLNEFVNNA | ANAGKMSAML | SQFAKEH... |
| 1MBS__ | KSEDDMRrSE | DLRKHGNTVL | TALGGILKKK | ...GHHEAEL | KPLAQSHATK |
| 1MWC_A | KSEDEMKASE | DLKKHGNTVL | TALGGILKKK | ...GHHEAEL | TPLAQSHATK |
| 1MYT__ | .AQADIAGNA | AISAHGATVL | KKLGELLKAK | ...GSHAAIL | KPLANSHATK |
| 2MM1__ | KSEDEMKASE | DLKKHGATVL | TALGGILKKK | ...GHHEAEI | KPLAQSHATK |
| 101M__ | KTEAEMKASE | DLKKHGVTVL | TALGAILKKK | ...GHHEAEL | KPLAQSHATK |
| 1GJN_A | KTEAEMKASE | DLKKHGTVVL | TALGGILKKK | ...GHHEAEL | KPLAQSHATK |

|        |            |            |            |            |             |
|--------|------------|------------|------------|------------|-------------|
| 1EMY__ | HKIPIKYLEF | ..ISDAIIHV | LQSKHPAEFG | ADAQGAMKKA | LELFRNDIAA  |
| 1J52_A | HKIPIKYLEF | ..ISEAIIHV | LHSRHPGNFG | ADAQGAMNKA | LELFRKDIAA  |
| 1LHT__ | HKIPVKYLEF | ..ICEIIVKV | IAEKHPSDFG | ADSQAAMKKA | LELFRNDMAS  |
| 1MBA__ | VGFGVGSAQF | ENVRSMFPGF | VASVAAPPAG | ADA..AWTKL | FGLIIDALKA  |
| 1MBS__ | HKIPIKYLEF | ..ISEAIIHV | LHSKHPAEFG | ADAQAAMKKA | LELFRNDIAA  |
| 1MWC_A | HKIPVKYLEF | ..ISEAIIQV | LQSKHPGDFG | ADAQGAMSKA | LELFRNDMAA  |
| 1MYT__ | HKIPINNFKL | ..ISEVLVKV | MHEKAGLDAG | ..GQTALRNV | MGIIIIADLEA |
| 2MM1__ | HKIPVKYLEF | ..ISEAIIQV | LQSKHPGDFG | ADAQGAMNKA | LELFRKDMAS  |
| 101M__ | HKIPIKYLEF | ..ISEAIIHV | LHSRHPGNFG | ADAQGAMNKA | LELFRKDIAA  |
| 1GJN_A | HKIPIKYLEF | ..ISDAIIHV | LHSKHPGDFG | ADAQGAMTKA | LELFRNDIAA  |

|        |           |
|--------|-----------|
| 1EMY__ | KYKELGFQG |
| 1J52_A | KYKELGYQG |
| 1LHT__ | KYKEFGFQG |
| 1MBA__ | AGA.....  |
| 1MBS__ | KYKELGFHG |
| 1MWC_A | KYKELGFQG |
| 1MYT__ | NYKELGFSG |
| 2MM1__ | NYKELGFQG |
| 101M__ | KYKELGYQG |
| 1GJN_A | KYKELGFQG |

**1gpaA**

|       |            |            |            |            |            |
|-------|------------|------------|------------|------------|------------|
| 1em6A | .....      | .....      | .....      | .....ENVAE | LKKSFNRLHL |
| 1gpaA | .....      | .....      | ...RKQISVR | GLAGVENVTE | LKKNFNRLHL |
| 1ygpA | TRRLTGFLPQ | EIKSIDTMIP | LLSRALWNKH | QVKKFNKAED | FQDRFIDHVE |
| 1qm5A | .....      | .....      | .....      | .SQPIFNDKQ | FQEALSRQWQ |

|       |            |            |            |            |            |
|-------|------------|------------|------------|------------|------------|
| 1em6A | FTLVKDRNVA | TTRDYFALA  | HTVRDHLVGR | WIRTQQHYD  | KCPKRVYYLS |
| 1gpaA | FTLVKDRNVA | TPRDYFALA  | HTVRDHLVGR | WIRTQQHYE  | KDPKRIYYLS |
| 1ygpA | TTLARSLYNC | DDMVAYEAA  | MSIRDNLVID | WNKTQQKFTT | RDPKRVYYLS |
| 1qm5A | RYGLNSAAEM | TPRQWWLAVS | EALAEMLRQ  | P....FAKPV | ANQRHVNYIS |

|       |            |            |            |            |           |
|-------|------------|------------|------------|------------|-----------|
| 1em6A | LEFYMGRTLQ | NTMINLGLQN | ACDEAIYQLG | LDIEELEIE  | EDAGLGNGL |
| 1gpaA | LEFYMGRTLQ | NTMVNLALEN | ACDEATYQLG | LDMEELEIE  | EDAGLGNGL |
| 1ygpA | LEFLMGRALD | NALINMK... | .....IPELG | FKLEDVLDQE | PDAGLGNGL |
| 1qm5A | MEFLIGRLTG | NNLLNLGWYQ | DVQDSLKAYD | INLTDLLEE  | IDPALGNGL |

|       |            |            |            |            |            |
|-------|------------|------------|------------|------------|------------|
| 1em6A | GRLAACFLDS | MATLGLAAYG | YGIRYEGIF  | NQKIRDGWQV | EEADDWLRYG |
| 1gpaA | GRLAACFLDS | MATLGLAAYG | YGIRYEFIF  | NQKICGGWQM | EEADDWLRYG |
| 1ygpA | GRLAACFVDS | MATEGIPAWG | YGLRYEGIF  | AQKIIDGYQV | ETPDYWLNSG |
| 1qm5A | GRLAACFLDS | MATVQQSATG | YGLNYQYGLF | RQSFVDGKQV | EAPDDWHRSN |

|       |            |             |            |            |            |
|-------|------------|-------------|------------|------------|------------|
| 1em6A | NPWEKSRPEF | MLPVHFGYGV  | EHTNTGKWI  | DTQVVLALPY | DTPVPGYMN  |
| 1gpaA | NPWEKARPEF | TLPVHFGYGRV | EHTSQGAKWV | DTQVVLAMPY | DTPVPGYRNN |
| 1ygpA | NPWEIERNEV | QIPVTFYGYV  | DRP....TWI | GGERVLAVAY | DFPVPFKTS  |
| 1qm5A | YPWFRHNEAL | DVQVGIGGKV  | TKD...GRWE | PEFTITGQAW | DLPVVGVRNG |

|       |             |             |            |            |             |
|-------|-------------|-------------|------------|------------|-------------|
| 1em6A | TVNTMRLWSA  | RAPG.....   | ....DYIQAV | LDRNLAENIS | RVLYPNDNFF  |
| 1gpaA | VVNTMRLWSA  | KAPNDFNLKD  | FNVGGYIQAV | LDRNLAENIS | RVLYPNDNFF  |
| 1ygpA | NVNNLRLWQA  | RPTTEFDLTK  | FNNGDYKNSV | AQQQRAESIT | AVLYPNDNFA  |
| 1qm5A | VAQPLRLWQA  | THAHPFDLTK  | FNDGDFLRAE | QQGINAEKLT | KVLYPNDNHT  |
|       |             |             |            |            |             |
| 1em6A | EGKELRLKQE  | YFVVAATLQD  | IIRRFKAS.. | .....TVF   | DAFPDQVAIQ  |
| 1gpaA | EGKELRLKQE  | YFVVAATLQD  | IIRRFKSSKF | GCRDPVRTNF | DAFPDKVAIQ  |
| 1ygpA | QGKELRLKQQ  | YFWCAASLHD  | ILRRFKKSK. | .....RPW   | TEFPDQVAIQ  |
| 1qm5A | AGKKLRLMQQ  | YFQCACSVAD  | ILRRHHLAGR | .....KL    | HELADYEVIQ  |
|       |             |             |            |            |             |
| 1em6A | LNDTHPALAI  | PELMRIFVDI  | EKLPSKAWK  | LTQKTFAYTN | HTVLPEALER  |
| 1gpaA | LNDTHPSLAI  | PELMRVLVDL  | ERLDWDKAWK | VTVKTCAYTN | HTVIPEALER  |
| 1ygpA | LNDTHPTLAI  | VELQRVLVDL  | EKLDWHEAWD | IVTKTFAYTN | HTVMQEALEK  |
| 1qm5A | LNDTHPTIAI  | PELLRVLIDE  | HQMSWDDAWA | ITSKTFAYTN | HTLMPEALER  |
|       |             |             |            |            |             |
| 1em6A | WPVDLVEKLL  | PRHLEIIYEI  | NQKHLDRIVA | LFPKDVDRLR | RMSLIEEEGS  |
| 1gpaA | WPVHLLLETL  | PRHLQIIYEI  | NQRFLNRVAA | AFPGDVDRLR | RMSLVEEGAV  |
| 1ygpA | WPRRFLFGHLL | PRHLEIIYDI  | NWFFLEDVAK | KFPKDVDLLS | RISIIEENSP  |
| 1qm5A | WDVKLVKGLL  | PRHMQIINEI  | NTRFKTLVEK | TWPGDEKVWA | KLAVVHD...  |
|       |             |             |            |            |             |
| 1em6A | KRINMAHLCI  | VGSHAVNGVA  | KIHSDIVKTK | VFKDFSELEP | DKFQNKTNIGI |
| 1gpaA | KRINMAHLCI  | AGSHAVNGVA  | RIHSEILKKT | IFKDFYELEP | HKFQNKTNIGI |
| 1ygpA | ERQRMAFLAI  | VGSHKVNGVV  | ELHSELIKTT | IFKDFIKFYF | SKFVNVTNIGI |
| 1qm5A | KQVHMANLCV  | VGGFAVNGVA  | ALHSDLVVKD | LFPEYHQLWP | NKFHNVTNIGI |
|       |             |             |            |            |             |
| 1em6A | TPRRWLLLCN  | PGLAELIAEK  | IGEDYVKDLS | QLTKLHSFLG | DDVFLRELAK  |
| 1gpaA | TPRRWLVLNC  | PGLAEIIAER  | IGEEYISDL  | QLRKLLSYVD | DEAFIRDVAK  |
| 1ygpA | TPRRWLKQAN  | PSLAKLISET  | LNEEYLLDMA | KLTQLEKYVE | DKEFLKKWNQ  |
| 1qm5A | TPRRWIKQCN  | PALAALLDKS  | LQKEWANDLD | QLINLEKFAD | DAKFRDQYRE  |
|       |             |             |            |            |             |
| 1em6A | VKQENKLFKS  | QFLETEYKVK  | INPSSMFDVQ | VKRIHEYKRQ | LLNCLHVITM  |
| 1gpaA | VKQENKLFKA  | AYLEREYKVH  | INPNSLFDVQ | VKRIHEYKRQ | LLNCLHVITL  |
| 1ygpA | VKLNNKIRLV  | DLIKKENDGV  | DIDDTLFDMQ | VKRIHEYKRQ | QLNVFGIIYR  |
| 1qm5A | IKQANKVRLA  | EFVKVRTGIE  | INPQAIFDIQ | IKRLHEYKRQ | HLNLLHILAL  |
|       |             |             |            |            |             |
| 1em6A | YNRIKKDP..  | .FVPRTVIIG  | GKAAPGYHMA | KMIIKLITSV | ADVNNNDPMV  |
| 1gpaA | YNRIKKEPNK  | FVVPRTVMIG  | GKAAPGYHMA | KMIIKLITAI | GDVVNHDPVV  |
| 1ygpA | YLAMKNEVAR  | KYPRKVSIFG  | GKSAPGYMA  | KLIIKLINCV | ADIVNNDESI  |
| 1qm5A | YKEIRENPQA  | DRVPRVFLFG  | AKAAPGYLLA | KNIIFAINKV | ADVINNNDPLV |
|       |             |             |            |            |             |
| 1em6A | GSKLKVIFLE  | NYRVSLAEKV  | IPATDLSEKI | STAGTEASGT | GNMKFMLNGA  |
| 1gpaA | GDRLRVIFLE  | NYRVSLAEKV  | IPAADLSEKI | STAGTEASGT | GNMKFMLNGA  |
| 1ygpA | EHLKVVVFVA  | DYNVSKAEII  | IPASDLSEHI | STAGTEASGT | SNMKFVMNGG  |
| 1qm5A | GDKLKVVFLLP | DYCVSAAEKL  | IPAADISEKI | STAGKEASGT | GNMKLALNGA  |
|       |             |             |            |            |             |
| 1em6A | LTIGTMDGAN  | VEMAEAEAGEE | NLFIFGMRID | DVAALDKKGY | EAKYYEALP   |
| 1gpaA | LTIGTMDGAN  | VEMAEAEAGEE | NFFIFGMRVE | DVDRLDQRGY | NAQEYYDRIP  |
| 1ygpA | LIIGTVDGAN  | VEITREIGED  | NVFLFGNLSE | NVEELRYNHQ | YHPQDL...P  |

|        |            |             |             |            |            |
|--------|------------|-------------|-------------|------------|------------|
| 1qm5A  | LTVGTLDGAN | VEIAEKVGEE  | NIFIFGHTVE  | QVKAILAKGY | DPVKWRKKDK |
| 1em6A  | ELKLVIDQID | NGFFSPKQPD  | LFKDIINMLF  | Y..HDRFKVF | ADYEAYVKCQ |
| 1gpaA  | ELRQIIEQLS | SGFFSPKQPD  | LFKDIVNMLM  | H..HDRFKVF | ADYEAYVKCQ |
| 1ygpA  | SLDSVLSYIE | ..QFSPENPN  | EFKPLVDSIK  | H..GDYYLVS | DDFESYLATH |
| 1qm5A  | VLDAVLKELE | SGKYS DGDKH | AFDQMLHSIG  | KQGGDPYLV  | ADFAAYVEAQ |
| 1em6A  | DKVSQLYMNP | KAWNTMVLKN  | IAASGKFSSD  | RTIKEYAQNI | WNVEPS.... |
| 1gpaA  | ERVSALYKNP | REWTRMVIRN  | IATSGKFSSD  | RTIAQYAREI | WGVEPSRQRL |
| 1ygpA  | ELVDQEFHNQ | REWLKKSMLS  | LANVGGFFSSD | RCIEEYSDTI | WNVEPVT... |
| 1qm5A  | KQVDVLYRDQ | EAWTRAAILN  | TARCGMFSSD  | RSIRDYQARI | WQAKR..... |
| 1em6A  | ...        |             |             |            |            |
| 1gpaA  | PAP        |             |             |            |            |
| 1ygpA  | ...        |             |             |            |            |
| 1qm5A  | ...        |             |             |            |            |
| FileUp |            |             |             |            |            |

**1g5yB**

|       |             |            |            |             |            |
|-------|-------------|------------|------------|-------------|------------|
| 1g5yB | .....       | PVERILEAEL | AVEPKTETYV | EA.....     | NM.....    |
| 1fm6D | ..PESADLRA  | LAKHLYDSYI | KSFPLTKAKA | RAILTGKTTD  | KSPFVIYDMN |
| 1dkfB | .....PEVGE  | LIEKVRKAHQ | ETFPA..... | .LC...QLGK  | YTT....SEQ |
| 1k74D | ..PESADLRA  | LAKHLYDSYI | KSFPLTKAKA | RAILTGKTTD  | KSPFVIYDMN |
| 1uhlB | ...MSPEQLG  | MIEKLVAQQ  | QCNRRS.... | .F.....     | .....      |
| 1xv9B | PVQLSKEQEE  | LIRTLGAHT  | RHMGTMFQEF | VQF...RPPA  | HLFIHQPLP  |
| 1rdtD | ..AESADLRA  | LAKHLYDSYI | KSFPLTKAKA | RAILTGKTTD  | KSPFVIYDMN |
| 1g5yB | .....G      | LNPSSP.... | .....NDPVT | NICQAADKQL  | FTLVEWAKRI |
| 1fm6D | SLMMGEDKIK  | FKHITPLQEQ | SKEVAIRIFQ | GCQFRSVEAV  | QEITEYAKSI |
| 1dkfB | .....       | .....R     | VSLD.IDLWD | KFSELSTKCI  | IKTVEFAKQL |
| 1k74D | SLMMGEDKIK  | FKHITPLQEQ | SKEVAIRIFQ | GCQFRSVEAV  | QEITEYAKSI |
| 1uhlB | .....       | .....      | .EAR.QQRFA | HFTELAIIVSV | QEIVDFAKQL |
| 1xv9B | .....       | .....T     | LAPV.LPLVT | HFADINTFMV  | LQVIKFTKDL |
| 1rdtD | SLM.....    | .....      | ..EVAIRIFQ | GCQFRSVEAV  | QEITEYAKSI |
| 1g5yB | PHFSELPLDD  | QVILLRAGWN | ELLIASFSTR | SIAVKDGILL  | .ATGLHVHR. |
| 1fm6D | PGFVNLDLND  | QVTLLKYGVH | EIIYTMLASL | MNK..DGVLI  | SEGQGFMTRE |
| 1dkfB | PGFTTLTIAD  | QITLLKAACL | DILILRICTR | YTPEQDTMTF  | .SDGLTLNR. |
| 1k74D | PGFVNLDLND  | QVTLLKYGVH | EIIYTMLASL | MNK..DGVLI  | SEGQGFMTRE |
| 1uhlB | PGFLQLSRED  | QIALLKTSAI | EVMLLETSRR | YNPGSESIT.  | ...DFSYNR. |
| 1xv9B | PVFRSLPIED  | QISLLKGAHV | EICHIVLNTT | FCLQTQNFLC  | ..GPLRYTI. |
| 1rdtD | PGFVNLDLND  | QVTLLKYGVH | EIIYTMLASL | MNK..DGVLI  | SEGQGFMTRE |
| 1g5yB | NSAHS.A.GVG | AIFDRVLTEL | VSKMRDMQMD | KTELGCLRAI  | VLFNPDSKGL |
| 1fm6D | FLKSLRKPGF  | DFMEPKFE.F | AVKFNALELD | DSDLAIPIAV  | IILSGDRPGL |
| 1dkfB | TQMHNAGFGP  | .LTDLVFA.F | ANQLLPLEMD | DAETGLLSAI  | CLICGDRQDL |
| 1k74D | FLKSLRKPGF  | DFMEPKFE.F | AVKFNALELD | DSDLAIPIAV  | IILSGDRPGL |
| 1uhlB | EDFAKAGLQV  | EFINPIFE.F | SRAMNELQLN | DAEFALLIAI  | SIFSADPNV  |

```

1xv9B      EDGARVGFQV EFLELLFH.F HGTLRKLQLQ EPEYVLLAAM ALFSPDRPGV
1rdtD      FLKSLRKPFQ DFMEPKFE.F AVKFNALQLD DSDLAIFIAV IILSGDRPGL

1g5yB      SNPAEVEALR EKVYASLEAY CKHK..YPEQ PGRFAKLLLR LPALRSIGLK
1fm6D      LNVKPIEDIQ DNLLQALELQ LKLN..HPES SQLFAKLLQK MTDLRQIVTE
1dkfB      EQPDRVDMLQ EPLLEALKVY VRKR..RPSR PHMFPKMLMK ITDLRSISAK
1k74D      LNVKPIEDIQ DNLLQALELQ LKLN..HPES SQLFAKLLQK MTDLRQIVTE
1uh1B      QDQLQVERLQ HTYVEALHAY VSIH..HPHD RLMFPRMLMK LVSLRTLSSV
1xv9B      TQRDEIDQLQ EEMALTLQSY IKGQQRPRD RFLYAKLLGL LAELRSINEA
1rdtD      LNVKPIEDIQ DNLLQALELQ LKLN..HPES SQLFAKLLQK MTDLRQIVTE

1g5yB      CLEHLFFFKL IGDTPIDTFL MEMLEAPH.
1fm6D      HVQLLQVIKK TETDMSLHPL LQEIYKDLY
1dkfB      GAERVITLKM E..IPGSMPP LIQEMLN.
1k74D      HVQLLQVIKK TETDMSLHPL LQEIYKDLY
1uh1B      HSEQVFALRL Q..DKKLPPL LSEIWDV..
1xv9B      YGYQIQHIQ. G..LSAMMPL LQEICS...
1rdtD      HVQLLQVIKK TETDMSLHPL LQEIYKDLY
PileUp

```

### 1kzkA

```

1KZK_A      .....PQITL WKRPLVTIRI GGQLKEALLD TGADDTVLEE MNLPGK....
1HSI_A      .....PQFSL WKRPVVTAYI EGQPVEVLLD TGADDSIVAG IELGNN....
1YTG_A      .....PQITL WKRPLVTIRI GGQLKEALLD TGADDTVLEE MNLPGK....
3FIV_A      YNKVGTITLTKL EKRPEILIFV NGYPIKFLLN TGADITILNR RDFQVKNISIE
2HPE_A      .....PQFSL WKRPVVTAYI EGQPVEVLLD TGADDSIVAG IELGNN....
1HII_A      .....PQFSL WKRPVVTAYI EGQPVEVLLD TGADDSIVAG IELGNN....

1KZK_A      .WPKPMIGGI GGFIVKVRQYD QIPVEICGHK AIGTVLVGPT PV.....
1HSI_A      .YSPKIVGGI GGFINTKEYK NVEIEVLNKK VRATIMTGDT PI.....
1YTG_A      .WPKPMIGGI GGFIVKVRQYD QIPVEICGHK AIGTVLVGPT PV.....
3FIV_A      NGRQNMIG.V GGGKRGTYNI NVHLEIRDEN YKTQXIFGNV CVLEDNSLIQ
2HPE_A      .YSPKIVGGI GGFINTLEYK NVEIEVLNKK VRATIMTGDT PI.....
1HII_A      .YSPKIVGGI GGFINTKEYK NVEIEVLNKK VRATIMTGDT PI.....

1KZK_A      NIIGRNLLTQ IGCTLNF
1HSI_A      NIFGRNILTA LGMSLNL
1YTG_A      NIIGRNLLTQ IGCTLNF
3FIV_A      PLLGRDNMIK FNIRLVM
2HPE_A      NIFGRNILTA LGMSLNL
1HII_A      NIFGRNILTA LGMSLNL

```

**Figure 3** Structural alignments of the seven studied families.



Figure 4

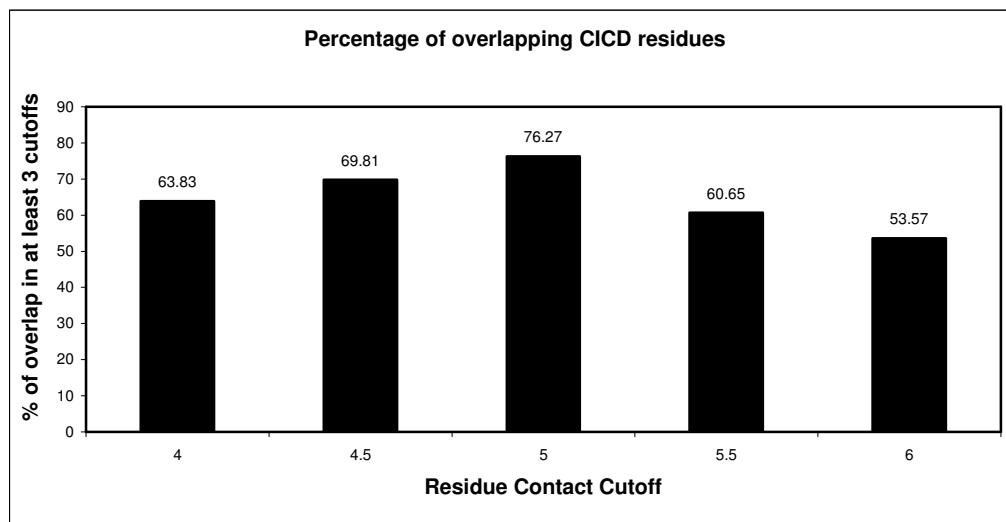

**Figure 4** Percentage of overlapping CICD residues for different residue contact cutoff values (4, 4.5, 5, 5.5, 6). We considered overlapping CICD residues as those positions predicted in at least three cutoffs. Notice that the highest percentage of overlapping corresponds to 5 Å.

Figure 5

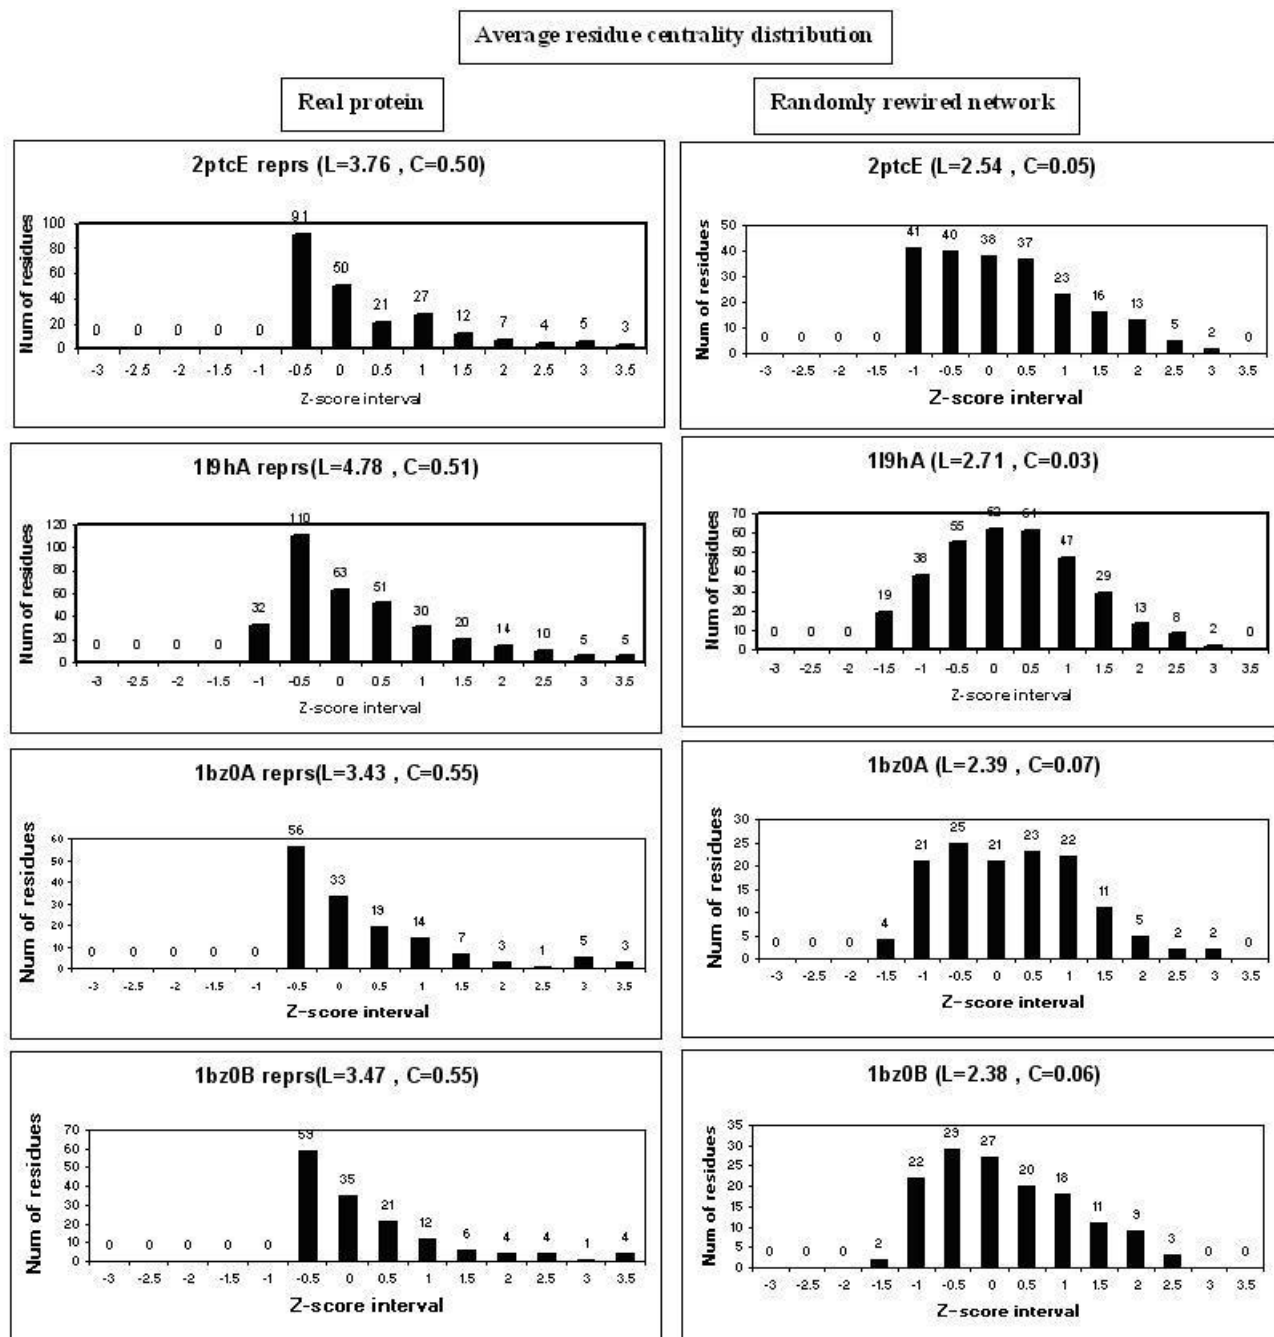

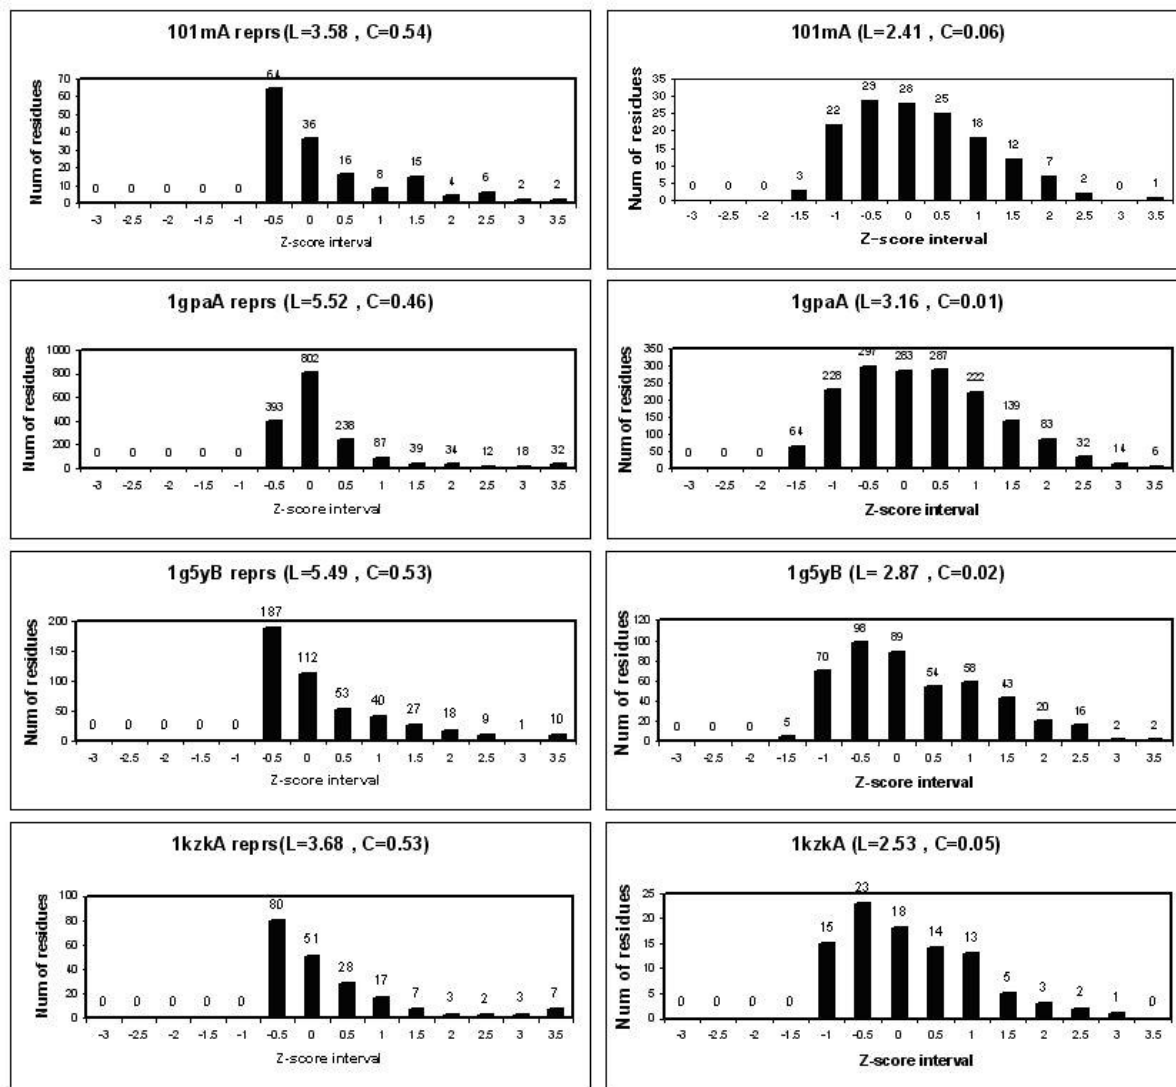

**Figure 5** Averaged residue centrality distributions for each family representative protein and its corresponding randomly rewired network. The network clustering coefficient and characteristic path length are indicated in each case.

Figure 6

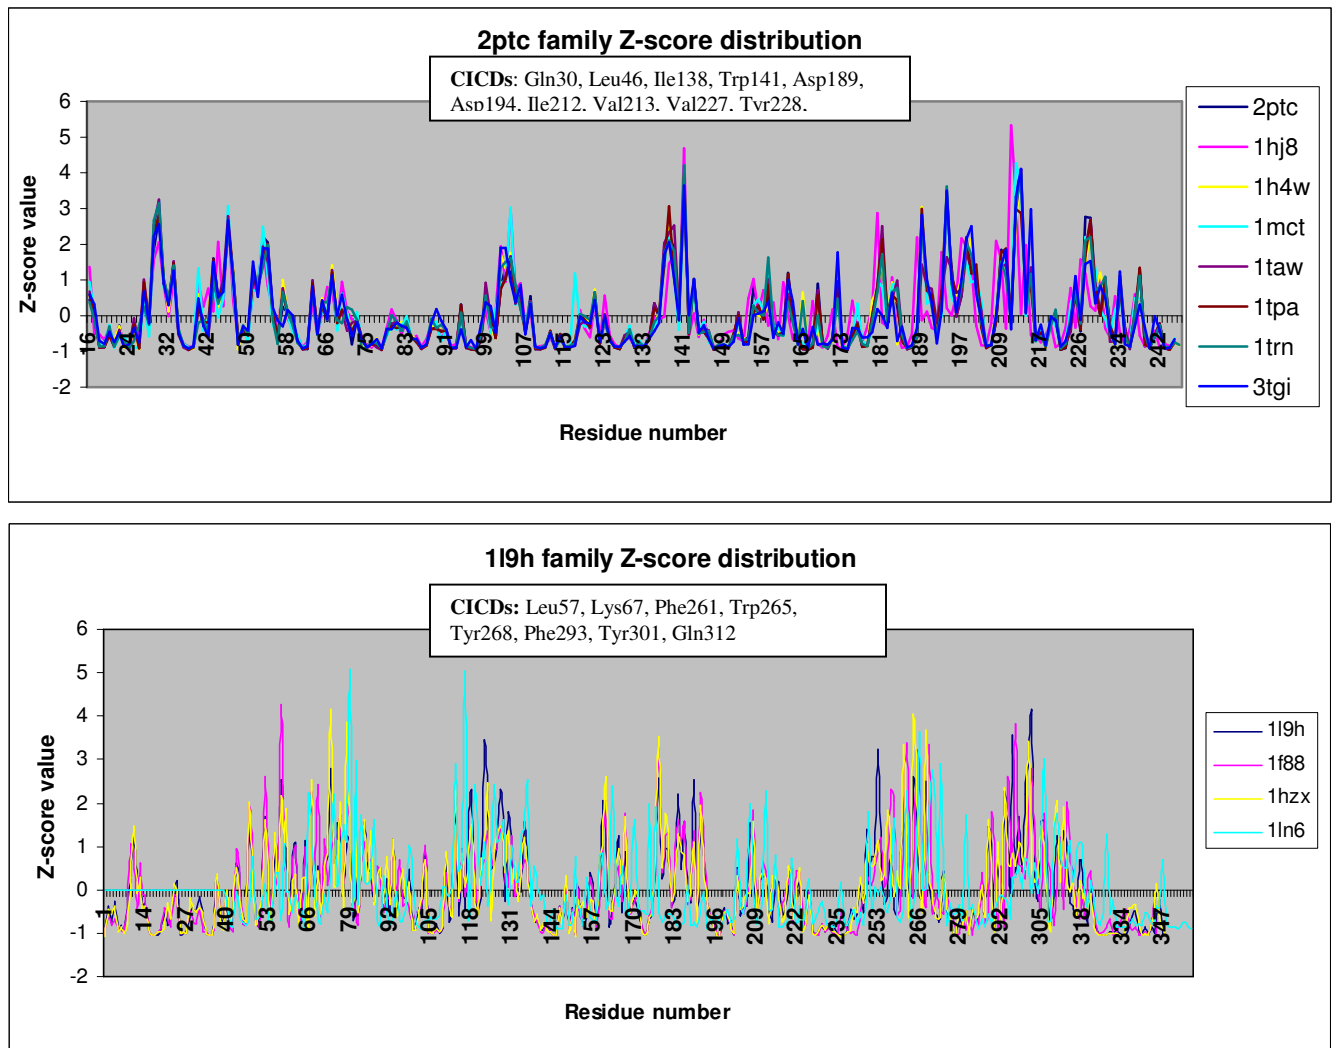

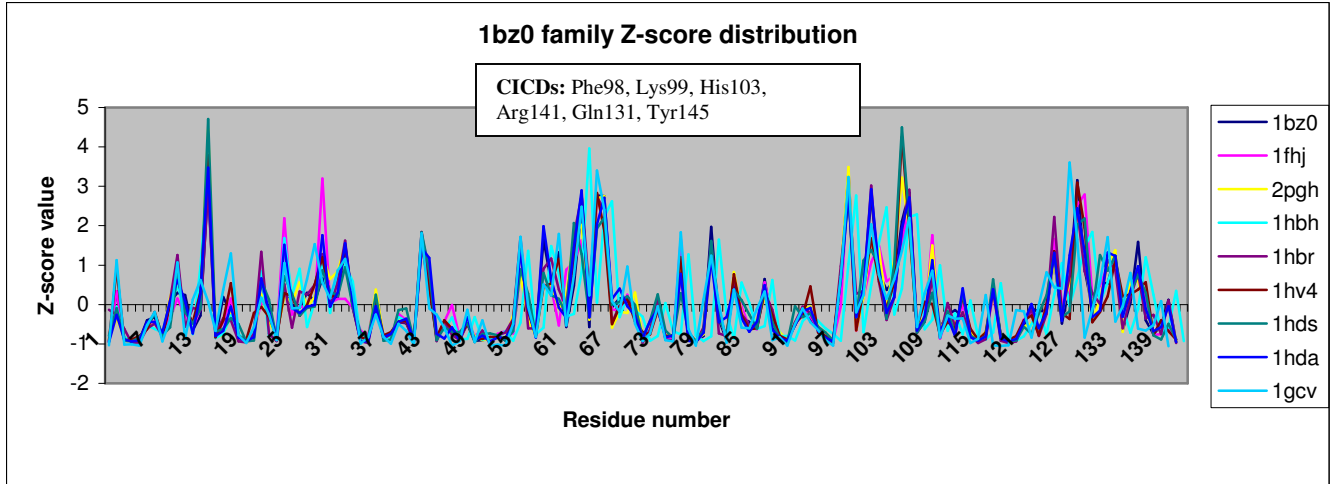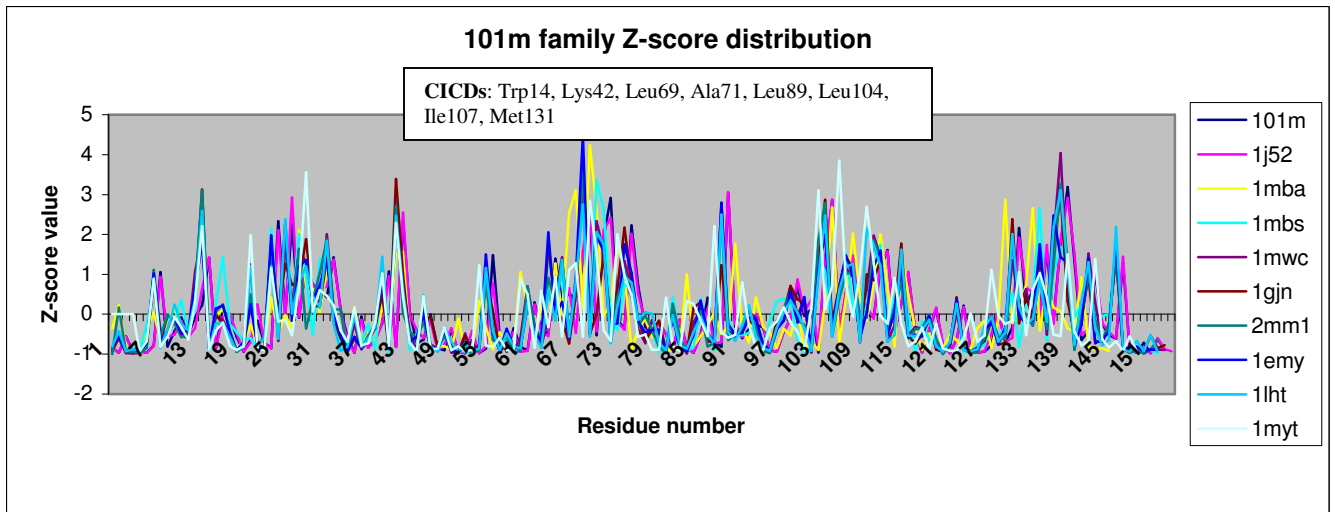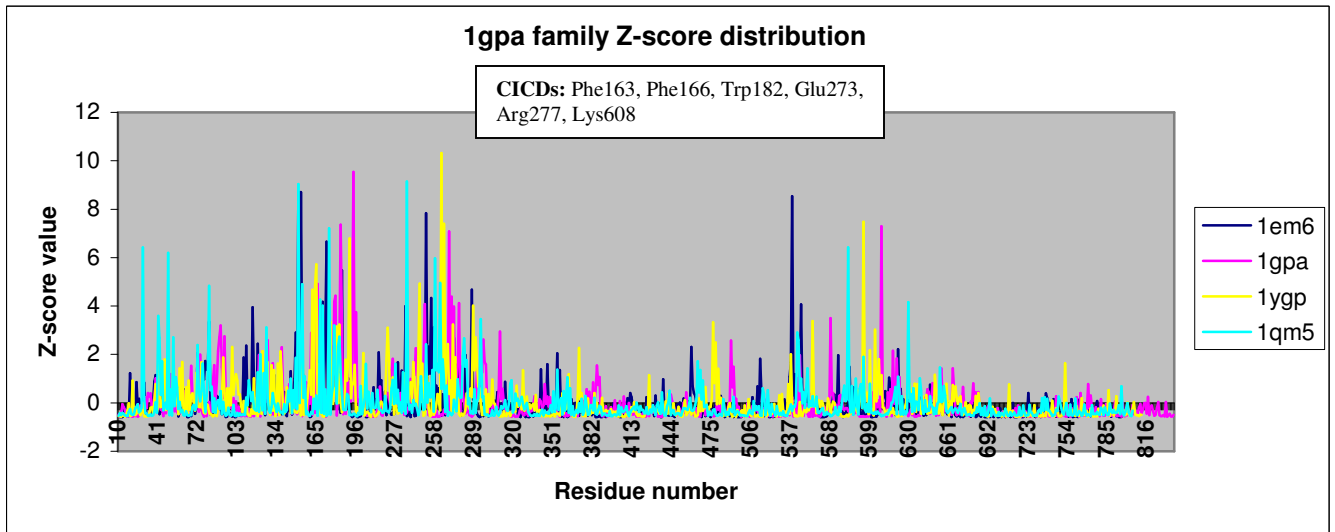

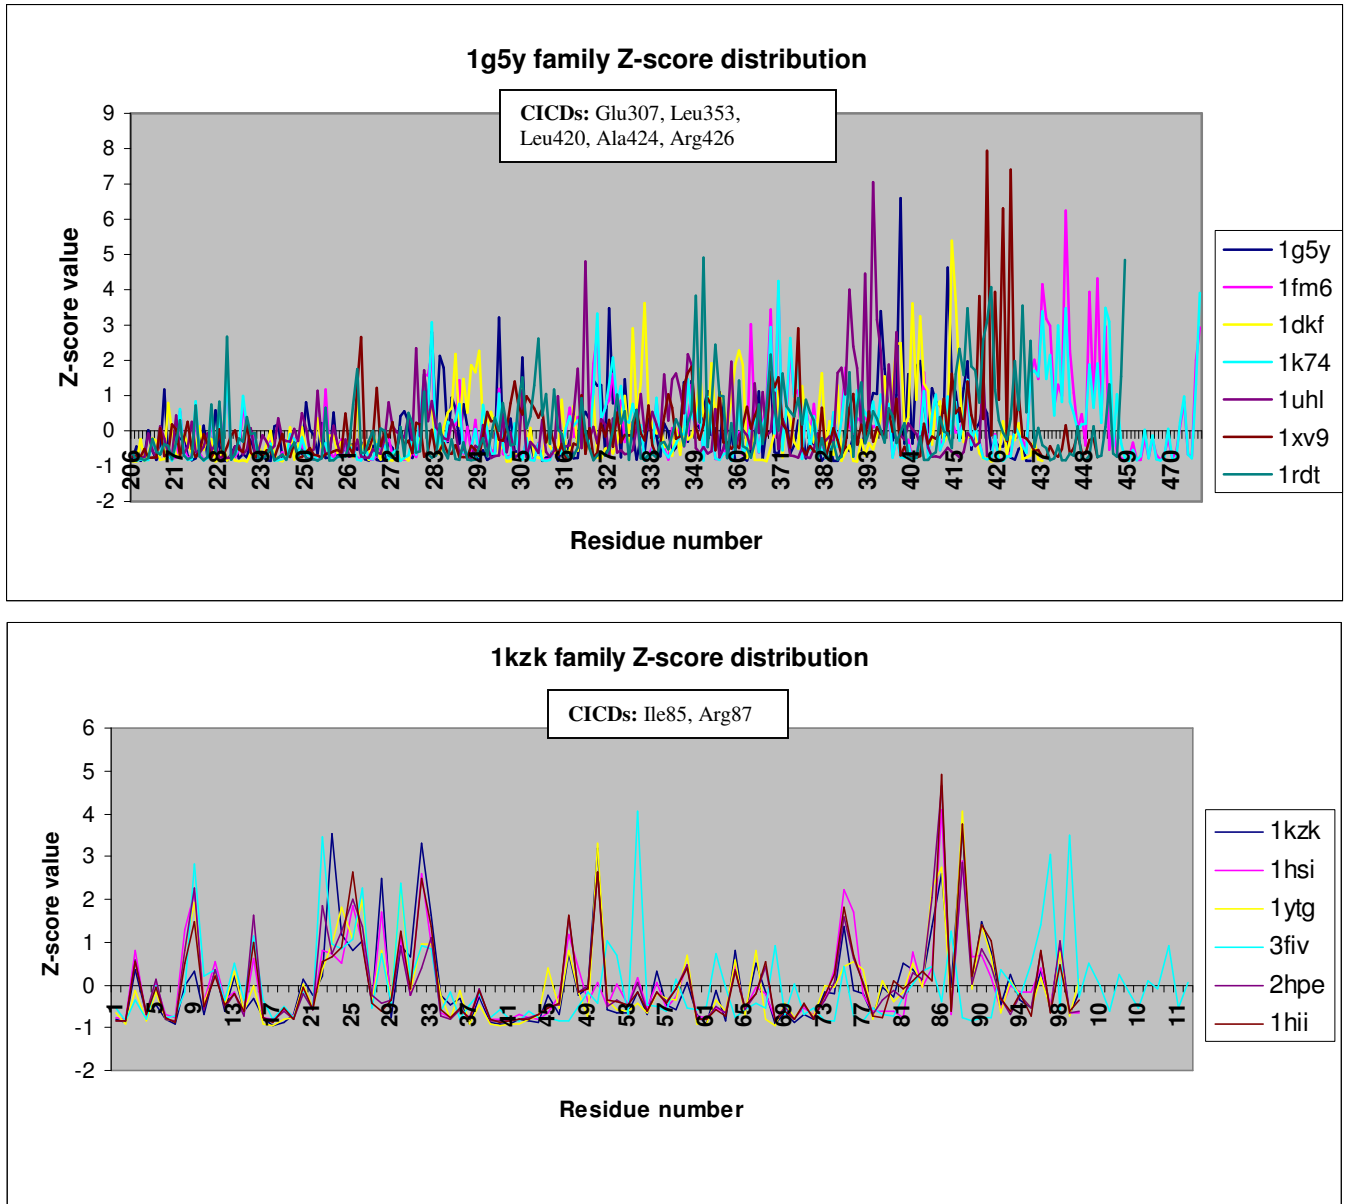

**Figure 6** Residue centrality z-score distributions for all the members of the seven studied families. In each case, the distribution of each family member is depicted in a different color. The CICD residues are indicated.
